# Supplementary material for: Islet transplantation in patients with autoimmune diabetes induces homeostatic cytokines that expand autoreactive memory T cells
Source: JCI journal article supplement (doi:10.1172/jci35197), 2008-04-01
Supplement: sd1 [file 1]

Supplementary Figure 1

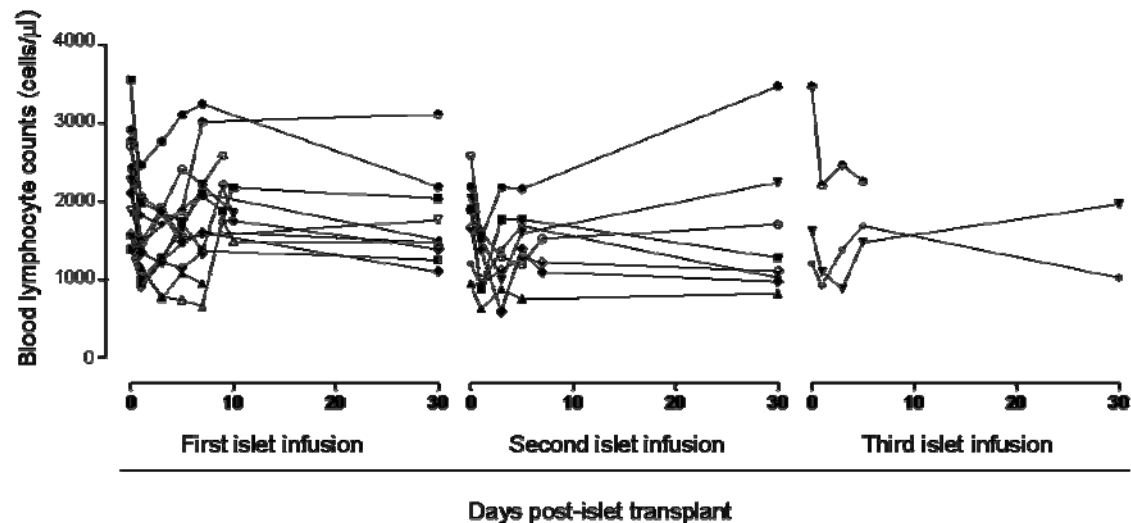

## Supplementary Figure 2

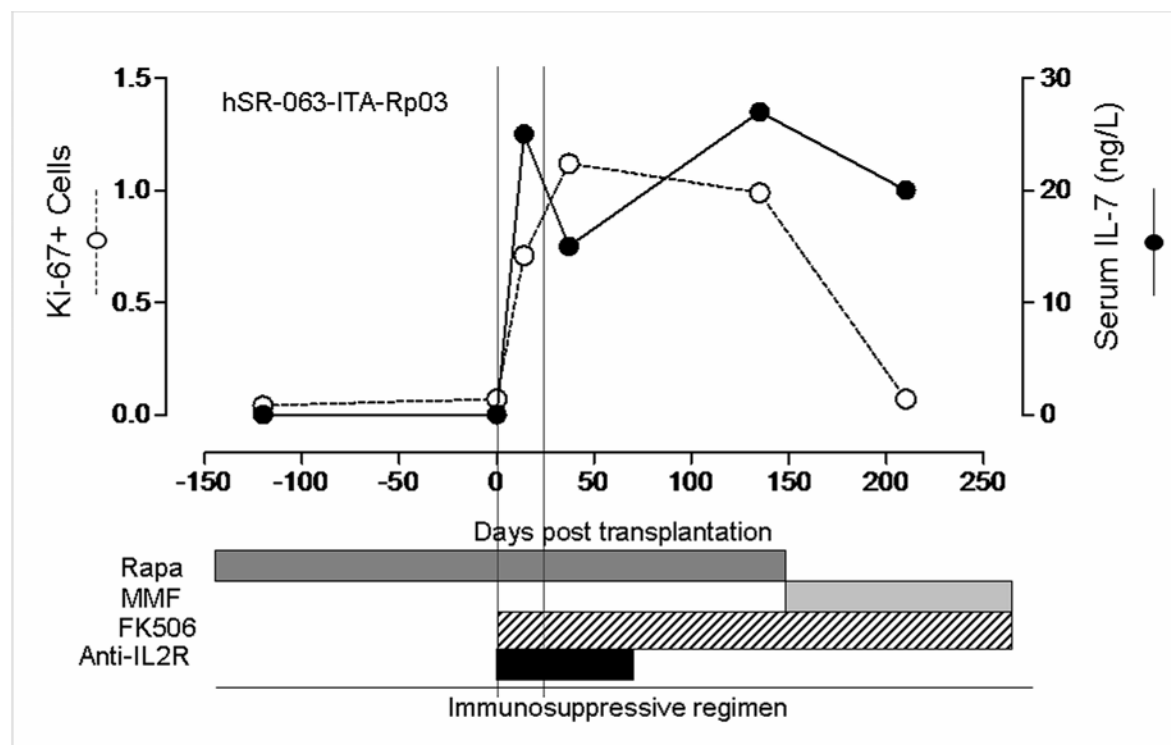

### Supplementary Figure 1

Total lymphocyte counts following islet transplantation for individual patients, Results are shown for the first 30 days after the first islet infusion ( $n=13$ ), after the second islet infusion in patients who received two infusions ( $n=11$ ), and after the third infusion in 3 patients.

### Supplementary Figure 2

Sequential values of lymphocyte Ki-67 positivity (open circle, left ordinate axis) and serum IL-7 concentrations (filled circle, right ordinate axis) relative to days post-transplantation (abscissa) in the second patient who was alternated from rapamycin to micophenolate mofetil due to rapamycin intolerance (patient hSR-063-ITA-Rp03). The period of therapy for anti-IL2R (filled black bars), FK506 (hatched bar), MMF (filled light gray bars), and rapamycin (filled dark gray bars) and is indicated below the abscissa.
